# Supplementary material for: Structural Inheritance and Redox Performance of Nanoporous Electrodes from Nanocrystalline Fe85.2B10-14P0-4Cu0.8 Alloys
Source: MDPI journal article supplement (doi:10.3390/nano7060141), 2017-06-08
Supplement: s1 [file s1]

### Supplementary figure:

Fig. S1 shows the elemental mapping of the nanocrystalline  $\text{Fe}_{85.2}\text{B}_{10}\text{P}_4\text{Cu}_{0.8}$  alloys at the region where the one  $\alpha$ -Fe nanocrystal distributed. The seed element, Cu is randomly distributed. The P element is enriched in the adjacent amorphous phase, and on the other hand Fe element has a higher concentration in the crystalline phase ( $\alpha$ -Fe nanocrystals).

Fig. S2 presents the collected data of the particle size and pore size the grain size of  $\alpha$ -Fe nanocrystals (a, b) in as-annealed  $\text{Fe}_{85.2}\text{B}_{14}\text{Cu}_{0.8}$  and  $\text{Fe}_{85.2}\text{B}_{10}\text{P}_4\text{Cu}_{0.8}$  alloys and pore size (c, d) in as-dealloyed  $\text{Fe}_{85.2}\text{B}_{14}\text{Cu}_{0.8}$  and  $\text{Fe}_{85.2}\text{B}_{10}\text{P}_4\text{Cu}_{0.8}$  alloys. The value of  $D_2$  and  $d_2$  was obtained from the three TEM images similar with Figs. 2a, d and 4a, d for each condition. The data of  $D_2$  and  $d_2$  were obtained from more than 125 sites for each TEM image by using Nanomeasure® software. The distribution ratio of  $\alpha$ -Fe nanocrystals in annealed  $\text{Fe}_{85.2}\text{B}_{14}\text{Cu}_{0.8}$  alloys in Fig. S2 b and nanopores in dealloyed  $\text{Fe}_{85.2}\text{B}_{10}\text{P}_4\text{Cu}_{0.8}$  alloys in Fig. S2 d is typical of the normal distribution. On the other hand, that of  $\alpha$ -Fe nanocrystals in annealed  $\text{Fe}_{85.2}\text{B}_{10}\text{P}_4\text{Cu}_{0.8}$  alloys in Fig. S2 a and nanopores in dealloyed  $\text{Fe}_{85.2}\text{B}_{14}\text{Cu}_{0.8}$  alloys in Fig. S2 c shows a larger divergence, particular the  $\alpha$ -Fe nanocrystals with a large size of more than 60 nm and nanopores with a pore size of larger than 30 nm. The data demonstrate that the uniformity of the nanoporous structure in dealloyed  $\text{Fe}_{85.2}\text{B}_{10}\text{P}_4\text{Cu}_{0.8}$  alloys is better than that of dealloyed  $\text{Fe}_{85.2}\text{B}_{10}\text{P}_4\text{Cu}_{0.8}$  alloys due to the worse microstructure of annealed  $\text{Fe}_{85.2}\text{B}_{14}\text{Cu}_{0.8}$  alloys with irregular-shaped  $\alpha$ -Fe particles.

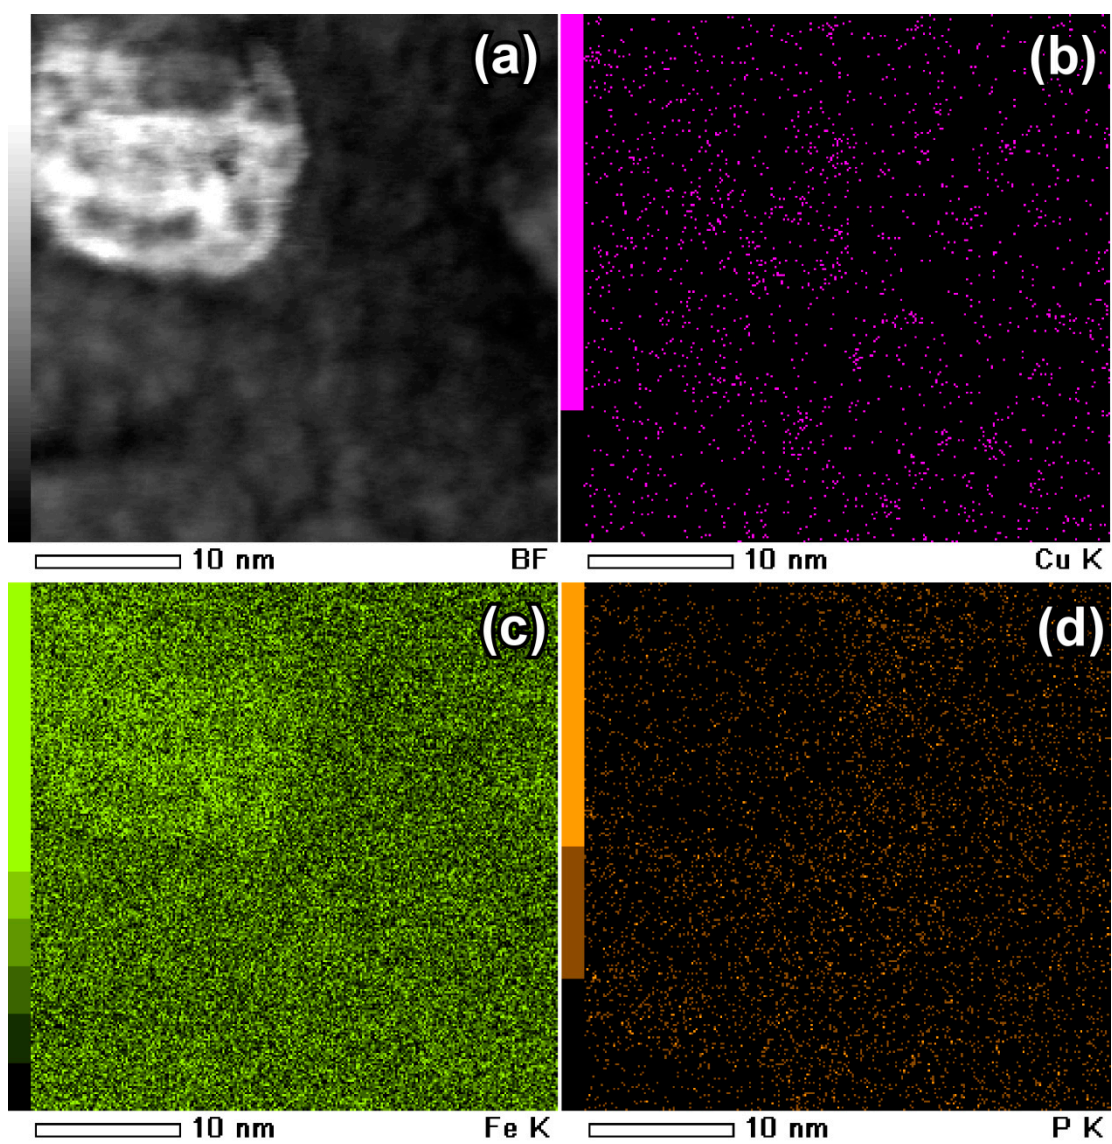

Fig. S1 BFI TEM image (a) and elemental mapping of Cu (b), Fe(c) and P (d) elements in the as-annealed  $\text{Fe}_{85.2}\text{B}_{10}\text{P}_4\text{Cu}_{0.8}$  alloys.

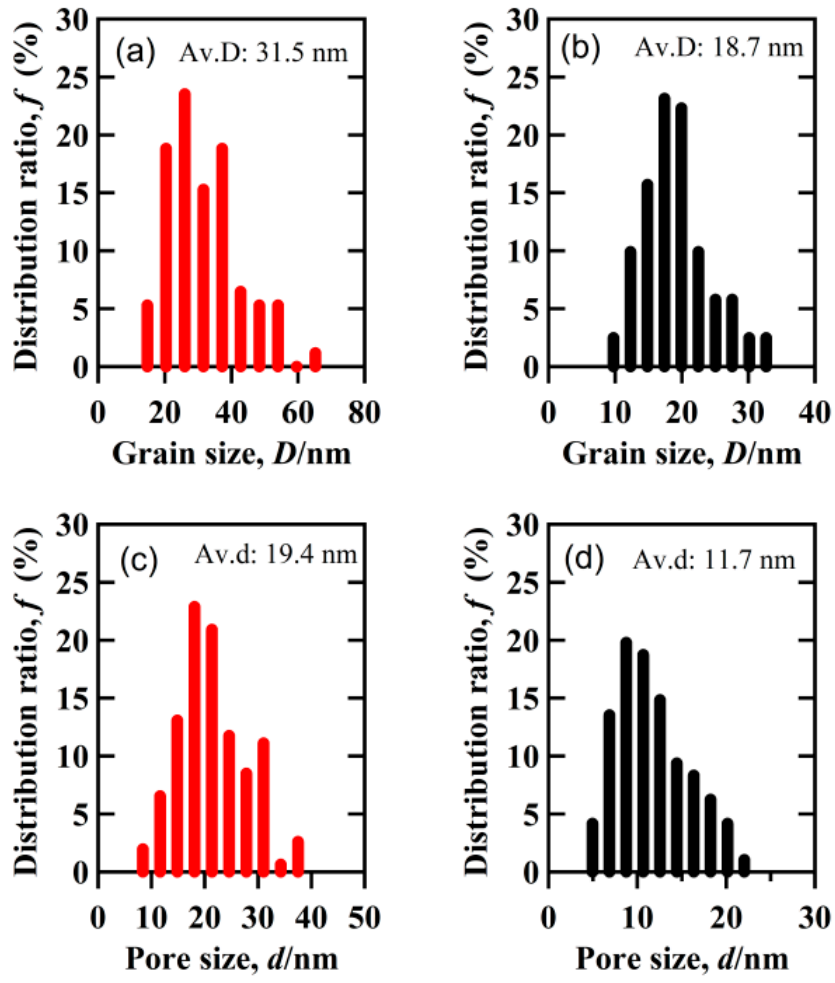

Fig. S2 The distribution ratio of the grain size of a-Fe nanocrystals (a, b) in as-annealed  $\text{Fe}_{85.2}\text{B}_{14}\text{Cu}_{0.8}$  and  $\text{Fe}_{85.2}\text{B}_{10}\text{P}_4\text{Cu}_{0.8}$  alloys and pore size (c, d) in as-dealloyed  $\text{Fe}_{85.2}\text{B}_{14}\text{Cu}_{0.8}$  and  $\text{Fe}_{85.2}\text{B}_{10}\text{P}_4\text{Cu}_{0.8}$  alloys.
